# Supplementary material
Source: PubMed Central journal article supplement (PMC7368163)
Supplement: jiz553_suppl_supplementary_table.pdf [file jiz553_suppl_supplementary_table.pdf]

Supplemental Table. Summary of survival, clinical scores, end-point viral RNA and antibody analysis in sHeVG mRNA LNP and PBS-vaccinated 6-week-old female Syrian golden hamsters challenged with low passage wild-type Nipah virus, genotype M.

| Group ID                        | Survival<br>DPI | Clinical Score* |          | NiV N RNA copy number (normalized to 18S rRNA) |          |          |          |          |          |          |          |          | NiV IgG ELISA adjusted absorbance |        |        |        | NiV VNT |
|---------------------------------|-----------------|-----------------|----------|------------------------------------------------|----------|----------|----------|----------|----------|----------|----------|----------|-----------------------------------|--------|--------|--------|---------|
|                                 |                 | At euth         | Max      | Liver                                          | Spleen   | Ovary    | Kidney   | Heart    | Lung     | Eye      | Brain    | Blood    | 1:100                             | 1:400  | 1:1600 | 1:6400 |         |
| VAX HI                          | 28              | 0               | 5        | 2.99E+02                                       | 3.99E+02 | 1.34E+00 | 3.01E-01 | ND       | ND       | 9.18E+06 | 2.55E+04 | ND       | 0.401                             | 0.095  | 0.047  | 0.013  | 320     |
|                                 | 28              | 0               | 0        | ND                                             | 2.62E+03 | 6.80E+01 | 2.36E+01 | 1.10E+02 | 2.28E+01 | 1.32E+00 | ND       | ND       | 0.377                             | 0.077  | 0.013  | -0.003 | 320     |
|                                 | 28              | 0               | 7        | 9.93E+01                                       | 1.39E+03 | 1.19E+01 | ND       | ND       | ND       | 6.98E+01 | 1.52E+06 | ND       | 0.367                             | 0.071  | 0.01   | -0.004 | 160     |
|                                 | 28              | 5               | 7        | 6.43E+02                                       | 2.85E+03 | 1.23E+02 | 7.38E+01 | ND       | 1.63E+02 | 3.16E+01 | 8.96E+04 | ND       | 0.492                             | 0.141  | 0.013  | -0.022 | 320     |
|                                 | 28              | 0               | 9        | 4.05E+02                                       | 1.71E+03 | 2.05E+02 | 5.36E+02 | ND       | 1.64E+01 | 9.64E+07 | 1.24E+04 | ND       | 0.425                             | 0.139  | -0.005 | -0.012 | 640     |
|                                 | 28              | 0               | 7        | ND                                             | 6.99E+03 | ND       | 3.39E+03 | ND       | 3.71E+01 | 1.53E+06 | 1.24E+03 | ND       | 1.107                             | 0.336  | 0.081  | 0.032  | 320     |
|                                 | 28              | 0               | 4        | 1.33E+02                                       | 2.63E+03 | 2.70E+00 | ND       | ND       | ND       | 4.47E+01 | 6.72E+04 | ND       | 0.505                             | 0.206  | 0.024  | -0.019 | 320     |
|                                 | 6               | 10              | 10       | 1.22E+05                                       | 1.43E+07 | 5.99E+06 | 1.03E+07 | 1.05E+05 | 1.26E+07 | 4.79E+05 | 1.79E+06 | ND       | 0.018                             | 0.016  | -0.02  | 0.014  | ND      |
|                                 | 6†              | 10              | 10       | 1.66E+05                                       | 1.92E+07 | 8.32E+07 | 1.82E+07 | 3.10E+05 | 7.98E+07 | NS       | 8.96E+04 | NS       |                                   |        | NS     |        | NS      |
| 6                               | 10              | 10              | 7.68E+04 | 3.45E+05                                       | 5.45E+06 | 3.01E+05 | 1.35E+05 | 8.54E+06 | 7.44E+04 | 1.17E+06 | 2.21E+02 | 0.029    | 0.021                             | -0.002 | -0.037 | 20     |         |
| VAX LO                          | 28              | 0               | 5        | ND                                             | 9.74E+02 | ND       | 0.371                             | 0.078  | -0.018 | 0.031  | 320     |
|                                 | 28              | 0               | 0        | 6.90E+02                                       | 4.54E+02 | ND       | 4.30E+02 | ND       | ND       | ND       | 3.24E+03 | ND       | 0.246                             | 0.051  | 0.008  | -0.044 | 320     |
|                                 | 28              | 0               | 7        | 1.35E+03                                       | 4.95E+03 | ND       | 5.39E+02 | ND       | ND       | ND       | 7.12E+02 | ND       | 0.305                             | 0.095  | 0.021  | -0.027 | 640     |
|                                 | 6†              | 10              | 10       | 2.52E+05                                       | 1.35E+06 | 1.13E+06 | 3.89E+06 | 1.34E+05 | 2.64E+04 | 7.58E+05 | 1.82E+05 | NS       |                                   |        | NS     |        | NS      |
|                                 | 6               | 10              | 10       | 3.48E+05                                       | 3.25E+06 | 4.55E+04 | 2.73E+06 | 3.47E+04 | 4.44E+06 | 3.66E+05 | 6.53E+05 | 4.50E+03 | -0.025                            | 0.034  | -0.018 | -0.088 | ND      |
|                                 | 6               | 10              | 10       | 1.48E+05                                       | 6.32E+05 | 6.37E+06 | 2.73E+06 | 6.54E+04 | 3.17E+06 | 3.75E+05 | 6.36E+06 | 3.53E+02 | -0.01                             | -0.007 | -0.041 | -0.049 | ND      |
|                                 | 9               | 10              | 10       | 3.28E+05                                       | 7.71E+05 | 6.09E+04 | 8.00E+05 | 5.47E+03 | 9.87E+04 | 4.02E+06 | 2.10E+04 | 1.70E+02 | 0.049                             | -0.007 | -0.034 | -0.045 | 20      |
|                                 | 6               | 10              | 10       | 1.42E+05                                       | 1.49E+06 | 4.93E+06 | 3.62E+06 | 7.12E+06 | 7.85E+05 | 1.13E+05 | 3.57E+05 | 1.05E+03 | -0.025                            | -0.019 | -0.015 | -0.056 | ND      |
|                                 | 6†              | 10              | 10       | 4.05E+05                                       | 2.19E+06 | 1.47E+07 | 8.61E+06 | 1.93E+05 | 3.01E+06 | 2.12E+05 | 3.86E+05 | NS       |                                   |        | NS     |        | NS      |
| 8                               | 10              | 10              | 1.40E+05 | 5.18E+05                                       | 6.15E+04 | 2.39E+06 | 2.61E+04 | 1.98E+04 | 7.74E+04 | 1.41E+07 | 2.40E+02 | -0.012   | -0.008                            | 0.002  | -0.071 | 10     |         |
| NO VAX                          | 6†              | 10              | 10       | 8.68E+05                                       | 6.54E+06 | 1.21E+08 | 2.27E+07 | 1.14E+05 | 1.24E+07 | 9.96E+05 | 7.86E+04 | NS       |                                   |        | NS     |        | NS      |
|                                 | 10              | 10              | 10       | 3.29E+04                                       | 1.25E+04 | 1.20E+03 | 8.80E+03 | ND       | 1.43E+03 | 1.80E+01 | 1.07E+05 | ND       | 0.001                             | -0.001 | -0.001 | -0.022 | INS     |
|                                 | 6               | 10              | 10       | 8.55E+05                                       | 1.69E+06 | 5.19E+06 | 2.09E+07 | 5.17E+06 | 7.10E+06 | 4.85E+06 | 1.68E+05 | 9.36E+02 | -0.022                            | 0.021  | -0.002 | -0.03  | INS     |
|                                 | 10              | 10              | 10       | 2.05E+05                                       | 7.21E+04 | 5.15E+03 | 2.73E+06 | 1.28E+03 | 1.74E+04 | 2.05E+05 | 1.75E+06 | 2.00E+02 | 0.008                             | 0.007  | -0.005 | -0.047 | INS     |
|                                 | 8               | 10              | 10       | 2.98E+05                                       | 5.16E+04 | 7.00E+05 | 1.65E+07 | 1.32E+04 | 1.54E+05 | 1.25E+06 | 5.11E+06 | ND       | 0.004                             | 0      | -0.002 | 0      | INS     |
|                                 | 6†              | 10              | 10       | 4.63E+05                                       | 2.94E+07 | 1.96E+07 | 2.92E+07 | 1.34E+06 | 9.26E+06 | 2.83E+06 | 5.21E+05 | NS       |                                   |        | NS     |        | NS      |
|                                 | 8               | 10              | 10       | 5.53E+04                                       | 6.32E+03 | 5.75E+03 | 5.81E+05 | 7.76E+02 | 1.69E+04 | 1.87E+02 | 2.78E+03 | ND       | 0.007                             | -0.002 | 0      | -0.009 | ND      |
|                                 | 8               | 10              | 10       | 2.88E+04                                       | 6.11E+04 | 2.08E+04 | 6.61E+04 | 3.53E+03 | 1.19E+04 | 3.26E+02 | 9.80E+04 | 2.61E+03 | 0.003                             | -0.006 | -0.003 | -0.01  | ND      |
|                                 | 7†              | 10              | 10       | 1.00E+06                                       | 2.56E+07 | 4.79E+07 | 1.86E+07 | 2.55E+05 | 1.25E+07 | 1.50E+06 | 1.41E+05 | NS       |                                   |        | NS     |        | NS      |
| 5                               | 10              | 10              | 6.29E+05 | 1.08E+07                                       | 2.26E+07 | 2.69E+07 | 1.61E+06 | 2.34E+07 | 2.40E+06 | 3.60E+05 | 3.90E+04 | 0.011    | -0.002                            | -0.002 | -0.005 | ND     |         |
| NEGATIVE CONTROL HAMSTER PLASMA |                 |                 |          | NT                                             |          |          |          |          |          |          |          |          | -0.001                            | -0.015 | 0.008  | -0.002 | NT      |
|                                 |                 |                 |          | NT                                             |          |          |          |          |          |          |          |          | -0.003                            | -0.005 | -0.004 | -0.003 | NT      |
|                                 |                 |                 |          | NT                                             |          |          |          |          |          |          |          |          | -0.006                            | -0.018 | -0.014 | -0.004 | NT      |
|                                 |                 |                 |          | NT                                             |          |          |          |          |          |          |          |          | -0.009                            | -0.022 | -0.003 | -0.011 | NT      |
|                                 |                 |                 |          | NT                                             |          |          |          |          |          |          |          |          | -0.007                            | -0.005 | 0      | -0.014 | NT      |

DPI, days post infection; †, Found dead; ND, not detected; NS, no sample; NT, not tested; VNT, virus neutralization titer; INS, insufficient sample. \* Score of 10 indicates score ≥ 10. RNA copy number was determined using 5 µL of RNA per sample.
