# Supplementary material
Source: PubMed Central journal article supplement (PMC7368163)

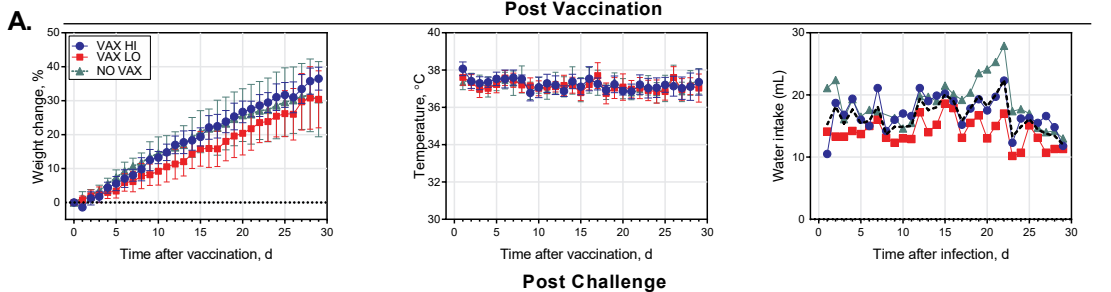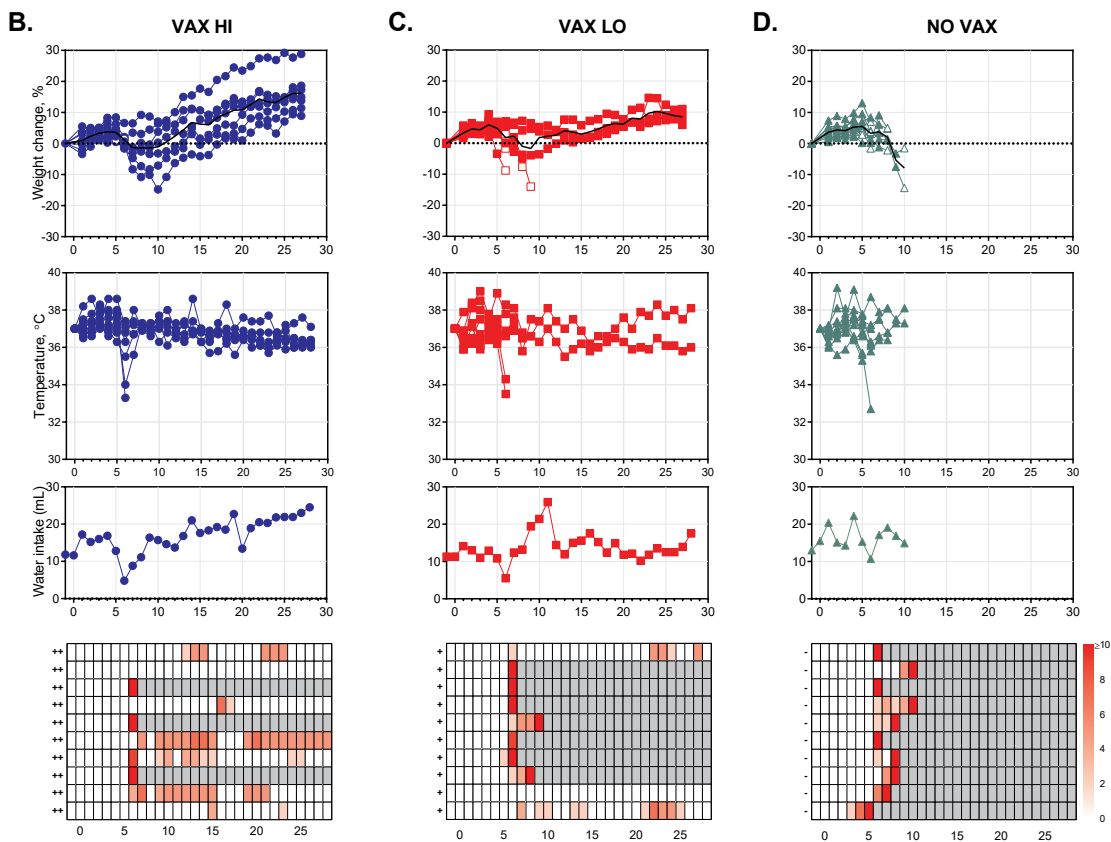

Supplement: jiz553_suppl_supplementary_figure.pdf [file jiz553_suppl_supplementary_figure.pdf]
